# Supplementary material
Source: PubMed Central journal article supplement (PMC7650252)
Supplement: supp_RA120.014466_160992_1_supp_578170_qdpdch.pdf [file supp_RA120.014466_160992_1_supp_578170_qdpdch.pdf]

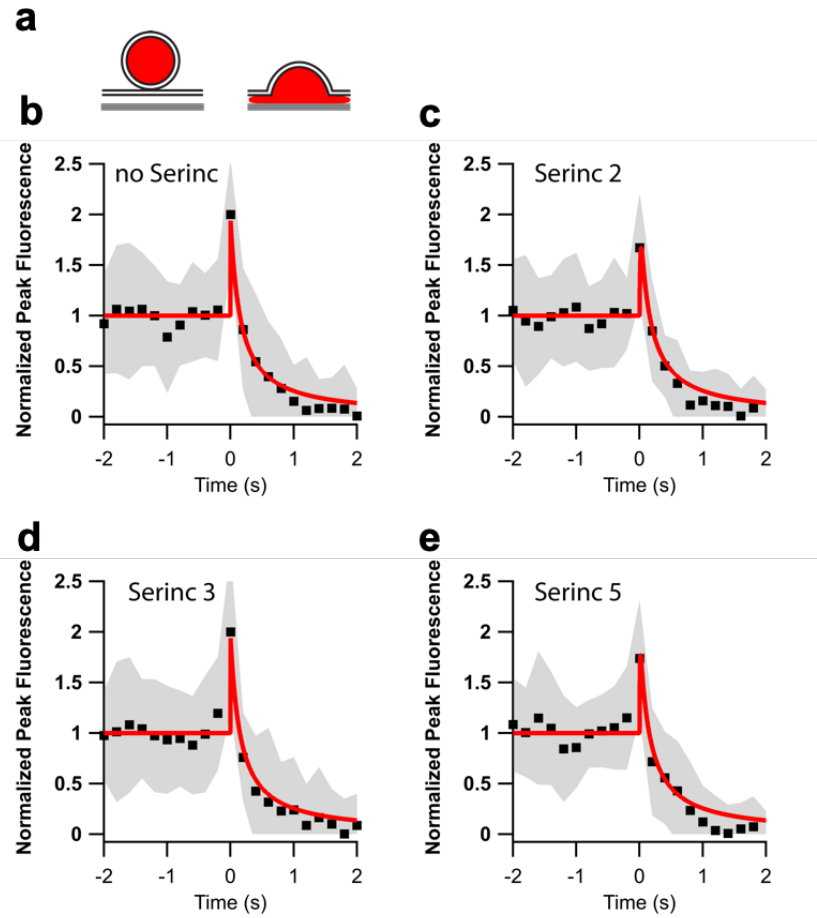

1  
2  
3  
4  
5  
6  
7  
8  
9  
10  
11  
12  
13  
14  
15  
16  
17  
18  
19  
20  
21

**Fig. S1. Model of mCherry content release from HIV pseudoviruses during fusion.** (a) Cartoon of pseudovirus mCherry content release model. We assume the mCherry content is freely mobile within the virus and is released into the aqueous cleft between SPPM and quartz slide at the onset of fusion pore opening with a specific release rate  $k$ . Within the cleft, mCherry diffuses in 2-dimensions with a characteristic diffusion coefficient  $D$  ( $0.1 \mu\text{m}^2/\text{s}$ ). Other numerical parameters of the model include the radius of the viral particle  $R$  ( $55 \text{ nm}$ ) and the characteristic penetration depth  $d_e$  of the evanescent field at the quartz/water interface. The release rate  $k$ , was adjusted for each type of pseudovirus (no Serinc: ( $1000 \text{ s}^{-1}$ , Serinc 2:  $100 \text{ s}^{-1}$ , Serinc 3:  $1000 \text{ s}^{-1}$ , Serinc 5:  $200 \text{ s}^{-1}$ ). The model is a simplified, one step release model, based on the more complex release model of secretory vesicles described in detail in Kreutzberger et al., 2017 (b-e). Average content release traces of HIV mCherry pseudoviruses with model calculations based on the parameters above. Individual fusion events for each virus were aligned to the peak at the onset of fusion and intensities were normalized to the “binding state” before fusion. Aligned and normalized traces were averaged and the mean (black squares) and standard deviation (grey shaded area) were plotted. (b) Serinc-lacking pseudovirus content release. Average represents 35 individual fusion events. (c) Serinc2 pseudovirus content release. Average represents 32 individual fusion events. (d) Serinc3 pseudovirus content release. Average represents 32 individual fusion events. (e) Serinc5 pseudovirus content release. Average represents 39 individual fusion events.

## Receptor Mediated Binding

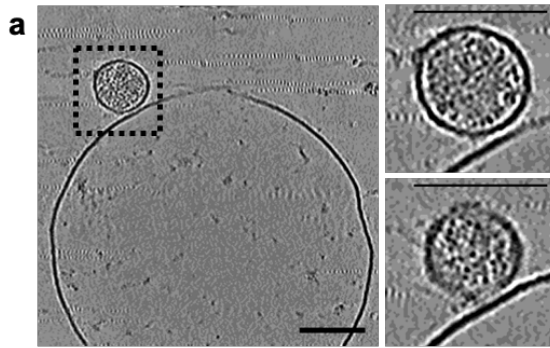

## Hemifusion

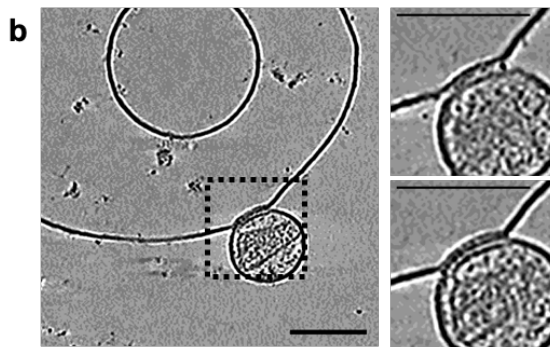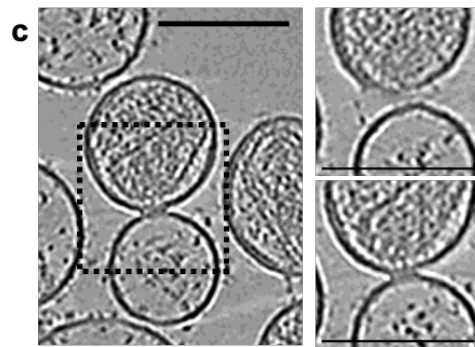

## Early Fusion Product

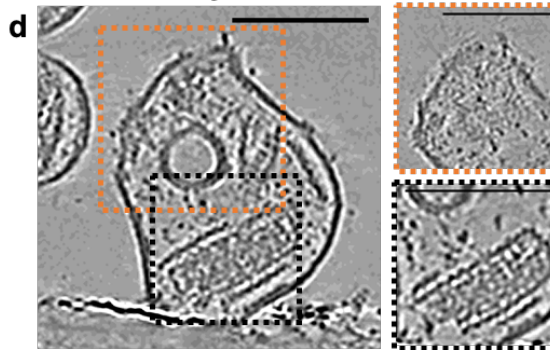

22  
23  
24  
25  
26  
27  
28  
29  
30  
31  
32

**Fig. S2. Additional examples of HIV pseudovirus-bleb fusion intermediates. All samples were supplemented with IP6.** Tomograms were all prepared with additional IP6 and are shown with cryoCARE denoising to enhance contrast for display. Scale bars are 100nm. (a) Example of receptor mediated binding (b) example of hemifusion with a wider area of contact (c) example of hemifusion with a narrower contact (d) Early fusion where a viral capsid and an enclosed vesicle can be seen. Many blebs are multilamellar (like the bleb in panel b) whereas viruses are never multilamellar. Additional views of the boxed areas at different slices in the z direction are shown to the right. The orange boxed inset shows that the internal vesicle is closed and does not extend as far out as the outer vesicle.

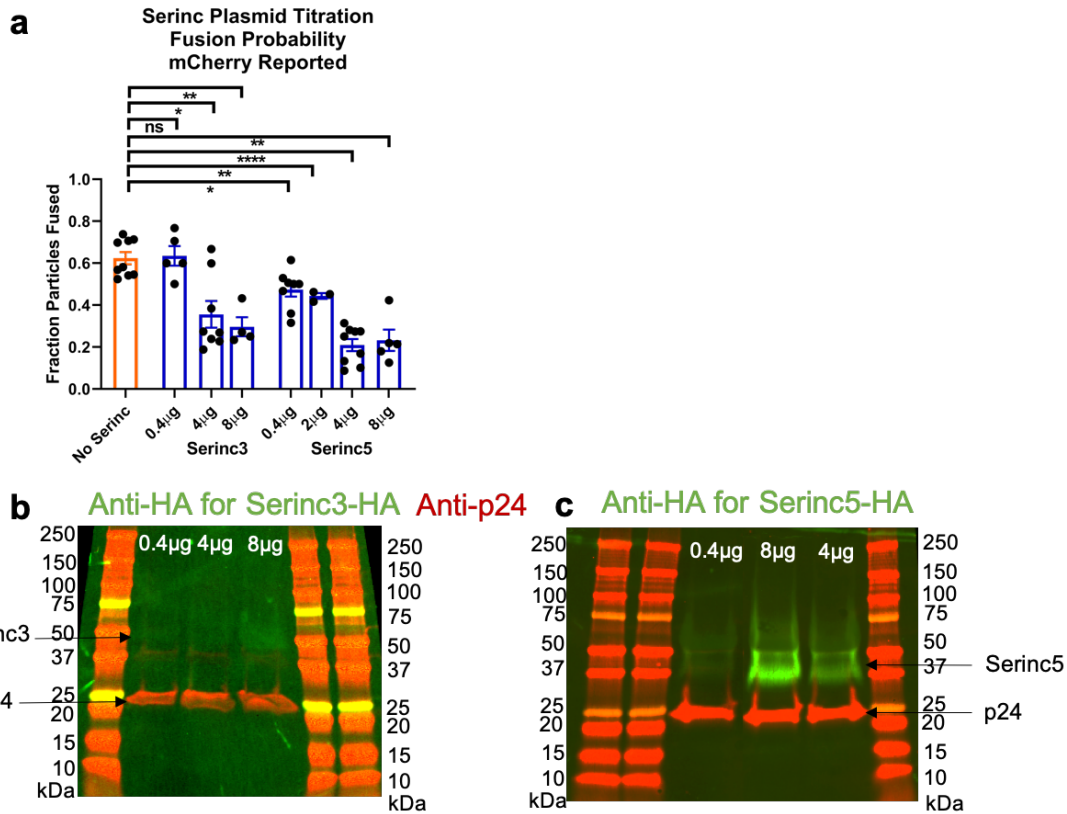

33

34 **Fig. S3. Titration of Serinc3 and Serinc5's viral incorporation and inhibition of viral**  
 35 **content release.** (a) Fraction of bound HIV pseudovirus particles that underwent fusion, as  
 36 reported by loss of mCherry content marker. Each point represents a separately prepared bilayer.  
 37 No Serinc and 4 µg data reproduced from Figure 3b for comparison. All other data collected  
 38 from 3 experiments and 1 preparation of HIV pseudovirus. (b,c) The pBJ5 Serinc plasmids are  
 39 expressed as C-terminal fusion proteins with an HA tag which was used for detection of Serinc  
 40 incorporation in HIV pseudoviruses by western blot (green channel). The concentration of p24 in  
 41 each preparation was measured by ELISA and a roughly normalized amount of pseudovirus was  
 42 loaded. p24 was detected by mouse anti-p24 (red channel). The expected molecular weights are  
 43 53kDa and 47kDa for Serinc3 and Serinc5 respectively. (b) Titration Serinc3 incorporation into  
 44 HIV pseudoviruses. The mass of pBJ5-Serinc3-HA plasmid transfected per 10 cm<sup>2</sup> plate is  
 45 indicated for each lane. (c) Titration Serinc5 incorporation into HIV pseudoviruses. The mass of  
 46 pBJ5-Serinc5-HA plasmid transfected per 10 cm<sup>2</sup> plate is indicated for each lane. The density of  
 47 Serinc5 bands is consistently higher than the density of Serinc3 bands for an equivalent amount  
 48 of virus (see Supplemental Figure 7).

49

50

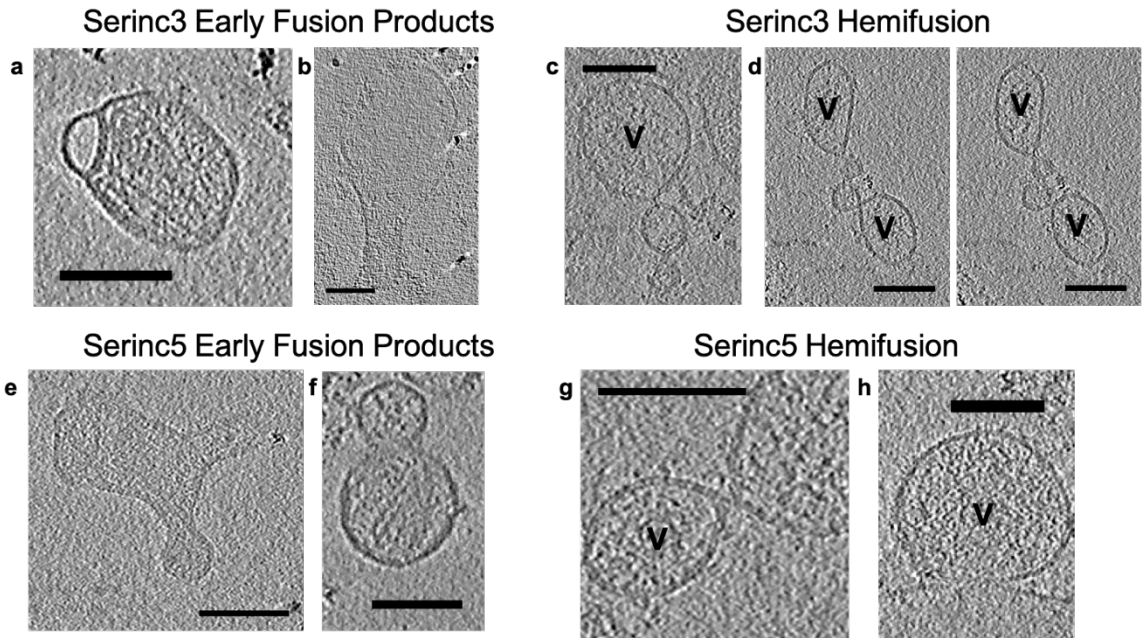

51  
 52  
 53  
 54  
 55  
 56  
 57  
 58  
 59  
 60  
 61  
 62  
 63

**Fig. S4. Additional examples of tomograms of Serinc3- and Serinc5-disrupted HIV fusion events.** All images are single z-slices through tomograms of HIV pseudoviruses mixed with CD4/CCR5-containing blebs and warmed to 37°C for 30 seconds before freezing. All scale bars are 100 nm. “v” designates a viral particle. (a) Serinc3 HIV pseudovirus mixed with blebs. Defocus = -10 μm. (b) Serinc3 HIV pseudovirus mixed with blebs. Defocus = -4 μm. (c) Serinc3 HIV pseudovirus mixed with blebs. Defocus = -4 μm. (d) Serinc3 HIV pseudovirus mixed with blebs. Defocus = -4 μm. (e) Serinc5 HIV pseudovirus mixed with blebs. Defocus = -4 μm. (f) Serinc3 HIV pseudovirus mixed with blebs. Defocus = -10 μm. (g) Serinc5 HIV pseudovirus mixed with blebs. Defocus = -4 μm. (h) Serinc5 HIV pseudovirus mixed with blebs. Defocus = -4 μm.

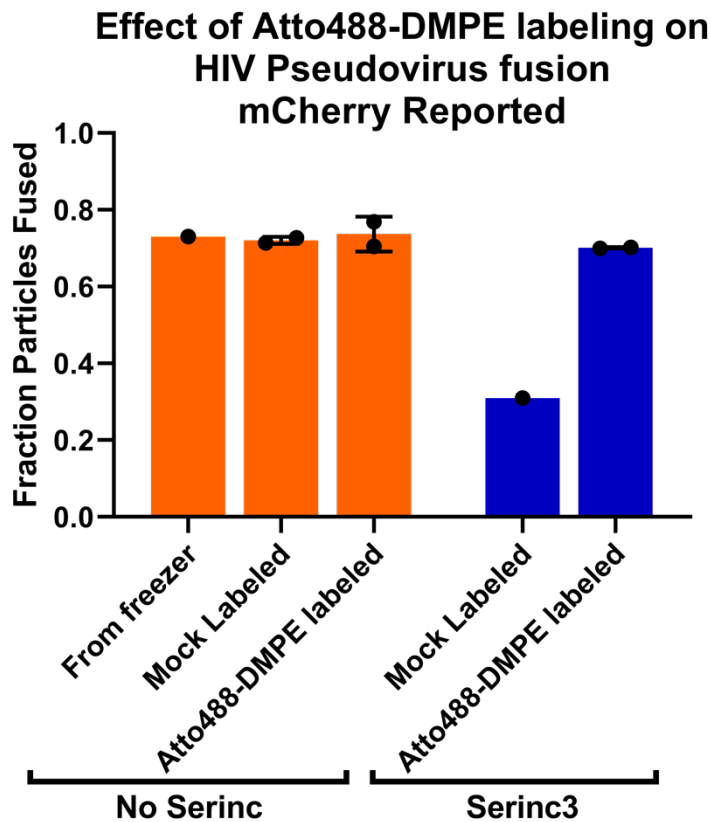

64  
 65 **Fig. S5. Atto488-DMPE labeling does not affect fusion of Serinc-lacking particles, but**  
 66 **increases fusion of Serinc3-containing particles.** Fraction of bound HIV pseudovirus particles  
 67 that underwent fusion, as reported by loss of mCherry content marker. Each point represents a  
 68 separately prepared SPPM. Data are paired repeats from a single experiment. The same  
 69 preparation of HIV pseudovirus was used for each set of conditions (Serinc-lacking or Serinc3,  
 70 respectively). The virus for the “No Serinc from freezer” condition was thawed immediately  
 71 before the experiment, diluted in buffer, and added directly to the SPPM without modification.  
 72 The mock labeled conditions were treated with the same buffers, incubations, and centrifugations  
 73 alongside the Atto488-DMPE labeled pseudovirus but without the addition of the lipid. Error  
 74 bars are SD.  
 75

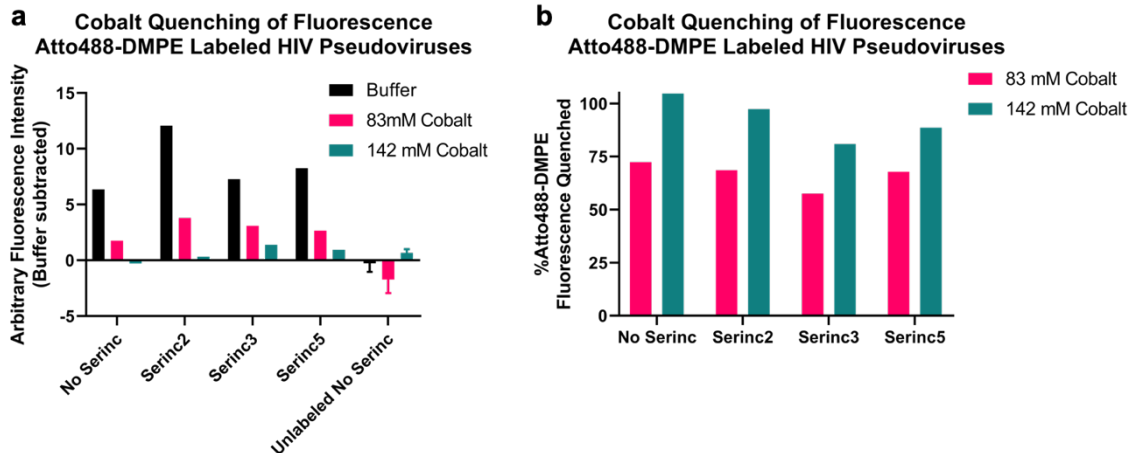

76

77 **Fig. S6. Atto488-DMPE is mostly confined to the outer leaflet of the viral membrane.** HIV  
 78 pseudoviruses were labeled with Atto488-DMPE as described in the Methods section and  
 79 fluorescence was measured in a plate reader (Exc 488nm, Em 514nm, Cutoff 505nm) before and  
 80 after addition of cobalt chloride to quench solvent accessible fluorophores. (a) Arbitrary  
 81 fluorescence intensity (buffer fluorescence subtracted) of HIV pseudoviruses before and after  
 82 cobalt addition. Data are from one experiment. Error bars show SD for 2 replicates of unlabeled  
 83 No Serinc virus (b) The same data as in panel a represented as percent of original fluorescence  
 84 remaining after cobalt addition.

85

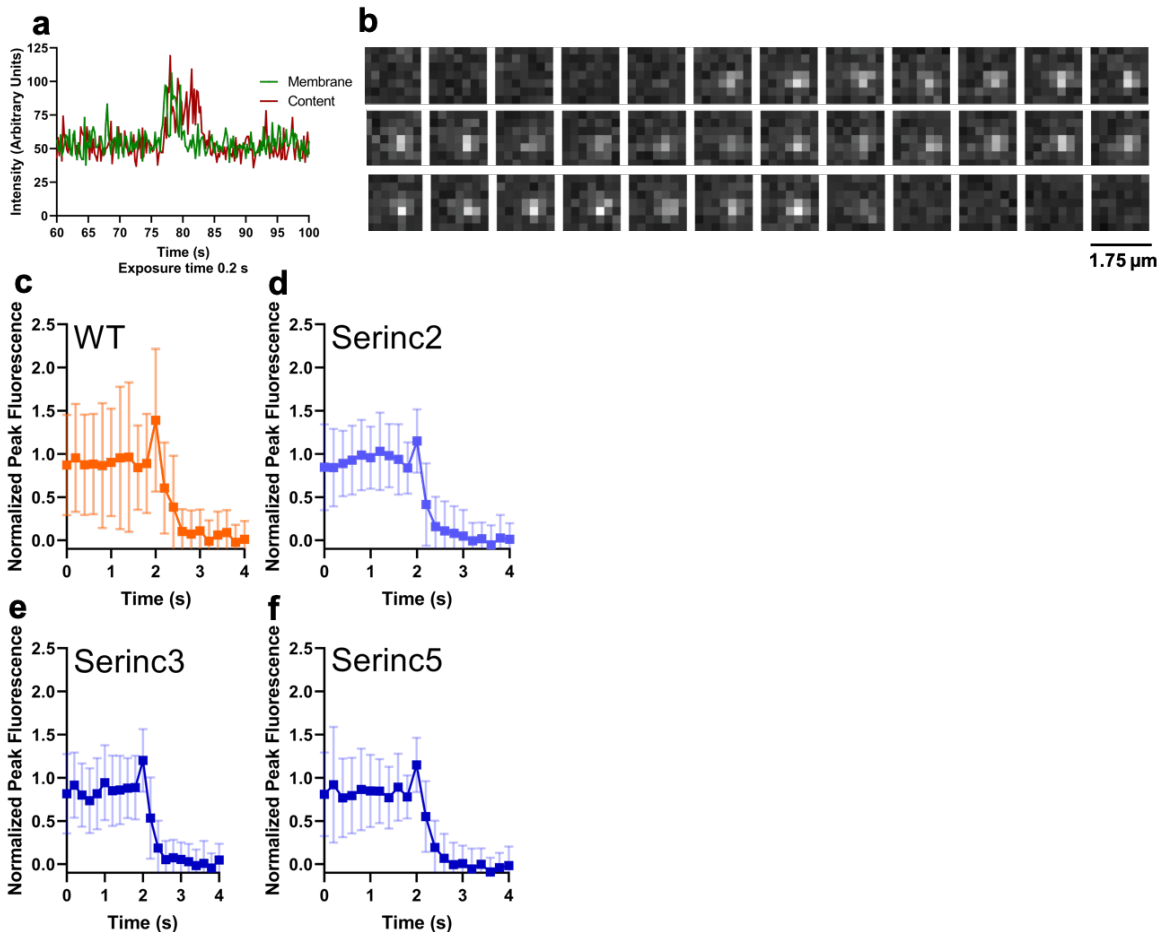

86

87 **Fig. S7. Average lipid mixing traces of HIV mCherry pseudoviruses labeled with Atto488-**  
 88 **DMPE.** (a) Fluorescence intensity of a dual labeled (mCherry and Atto488-DMPE) HIV  
 89 pseudovirus particle fusing with an SPPM. (b) Example micrographs of the membrane label for  
 90 the particle shown in panel a. Each box represents the same region separated in time by 0.2  
 91 seconds. (c-f) Individual events for each virus were aligned and normalized in the same manner  
 92 as the content release traces where events were aligned to peak at the onset of fusion and  
 93 intensities were normalized such that “binding” before fusion was set to one and “baseline” after  
 94 fusion was set to zero. Aligned and normalized traces were averaged together and the mean  
 95 (squares) and SD were plotted. Dissipation of the Atto488-DMPE after lipid mixing would be  
 96 expected to occur quickly via 2-dimensional diffusion of labeled lipids within the larger SPPM.  
 97 The smaller peaks we observe could be due to changes in the direction of the fluorescence dipole  
 98 as the spherical viral membrane collapses into the planar SPPM, as described by (Kießling et al.,  
 99 2010). Averaged lipid mixing trace of Atto488-DMPE labeled (c) Serinc-lacking (d) Serinc2 (e)  
 100 Serinc3 (d) Serinc5 mCherry pseudoviruses.

101

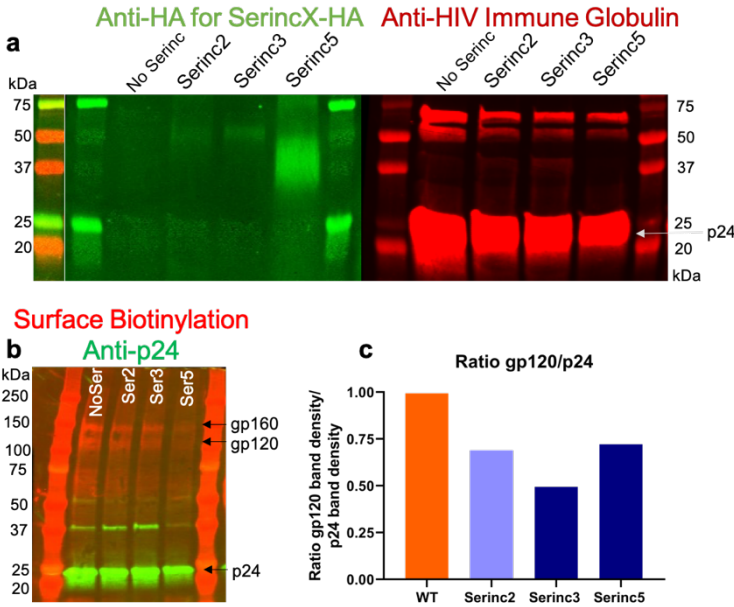

102

103 **Fig. S8. Protein incorporation into HIV pseudoviruses and effects on HIV pseudovirus**  
 104 **fusion.** (a) The pBJ5 Serinc plasmids are expressed as C-terminal fusion proteins with an HA tag  
 105 which was used for detection of Serinc incorporation in HIV pseudoviruses by western blot  
 106 (green channel). The concentration of p24 in each preparation was measured by ELISA and a  
 107 normalized amount of pseudovirus was loaded. p24 was detected by HIV Immune Globulin (red  
 108 channel) and used for normalization. Expected molecular weights of Serincs: Serinc2 51kDa,  
 109 Serinc3 53kDa, Serinc5 47kDa. (b) To assess surface glycoprotein incorporation, an equal  
 110 amount of virus as measured by p24 ELISA was surface biotinylated by sulfo-NHS-succinimide  
 111 ester before western blotting and detection by streptavidin-IR680 (red channel). (c)  
 112 Quantification of the ratio of the gp120 and p24 bands shown in b.

113



114 **Movie S1 (separate file). Z-slices through tomograms of HIV pseudovirus and blebs treated**  
115 **with fusion inhibitor, T20.** The video shows slices through the 3D volume of the same  
116 tomogram as Figure 2b, moving from the bottom to the top. The pseudovirus and bleb mixture  
117 was treated with 135 ng/mL T20. Tomogram is shown with non-anisotropic diffusion filtering to  
118 enhance contrast for display. Scale bars are 100 nm.

119

120 **Movie S2 (separate file). Z-slices through tomograms of HIV pseudovirus and blebs**  
121 **showing receptor mediated binding.** The video shows slices through the 3D volume of the  
122 same tomogram as Figure 2c, moving from the bottom to the top. The pseudovirus and bleb  
123 mixture was warmed to 37°C for 10 seconds before freezing. Tomogram is shown with  
124 cryoCARE denoising to enhance contrast for display. Scale bars are 100 nm.

125

126 **Movie S3 (separate file). Z-slices through tomograms of HIV pseudovirus and blebs**  
127 **showing hemifusion.** The video shows slices through the 3D volume of the same tomogram as  
128 Figure 2d, moving from the bottom to the top. The pseudovirus and bleb mixture was warmed to  
129 37°C for 10 seconds before freezing. Tomogram is shown with cryoCARE denoising to enhance  
130 contrast for display. Scale bars are 100 nm.

131

132 **Movie S4 (separate file). Z-slices through tomograms of Serinc2-containing HIV**  
133 **pseudovirus and blebs.** The video shows slices through the 3D volume of the same tomogram  
134 as Figure 3g, moving from the bottom to the top. The pseudovirus and bleb mixture was warmed  
135 to 37°C for 30 seconds before freezing. Tomogram is shown with cryoCARE denoising to  
136 enhance contrast for display. Scale bars are 100 nm.

137

138 **Movie S5 (separate file). Z-slices through tomograms of Serinc3-containing HIV**  
139 **pseudovirus and blebs.** The video shows slices through the 3D volume of the same tomogram  
140 as Figure 3i, moving from the bottom to the top. The pseudovirus and bleb mixture was warmed  
141 to 37°C for 30 seconds before freezing. Tomogram is shown with cryoCARE denoising to  
142 enhance contrast for display. Scale bars are 100 nm.

143

144 **Movie S6 (separate file). Z-slices through tomograms of Serinc5-containing HIV**  
145 **pseudovirus and blebs.** The video shows slices through the 3D volume of the same tomogram  
146 as Figure 3k, moving from the bottom to the top. The pseudovirus and bleb mixture was warmed  
147 to 37°C for 30 seconds before freezing. Tomogram is shown with cryoCARE denoising to  
148 enhance contrast for display. Scale bars are 100 nm.

149
